# Supplementary material for: The impact of EAES Fellowship Programme: a five-year review and evaluation
Source: Springer Nature journal article supplement (doi:10.1007/s00464-021-08525-8), 2021-06-08
Supplement: MOESM1 [file 464_2021_8525_MOESM1_ESM.pdf]

| EAES FELLOWSHIP EVALUATION                                                                            |                      |                                                |                 |                |              |                       |
|-------------------------------------------------------------------------------------------------------|----------------------|------------------------------------------------|-----------------|----------------|--------------|-----------------------|
| <b>Demographic</b>                                                                                    |                      |                                                |                 |                |              |                       |
| During the fellowship, I was a                                                                        | Surgeon (consultant) | How many years of independent practice: _____  |                 |                |              |                       |
|                                                                                                       | Resident (registrar) | How many years of postgraduate training: _____ |                 |                |              |                       |
| Which specialty(ies) did you specialise in:                                                           |                      |                                                |                 |                |              |                       |
| Which host organisation did the fellowship take place in?                                             |                      |                                                |                 |                |              |                       |
| Which specialty(ies) of surgery were you attached to during the fellowship?                           |                      |                                                |                 |                |              |                       |
| <b>During the Fellowship Period,</b>                                                                  |                      | <b>Strongly disagree</b>                       | <b>Disagree</b> | <b>Neutral</b> | <b>Agree</b> | <b>Strongly agree</b> |
| <b>Operative &amp; Clinical Experience</b>                                                            |                      |                                                |                 |                |              |                       |
| I had a good access to attending /observing the operating theatres.                                   |                      |                                                |                 |                |              |                       |
| I was able to assist in the operations.                                                               |                      |                                                |                 |                |              |                       |
| I had a good access to the clinical activities such as ward rounds and outpatient clinics.            |                      |                                                |                 |                |              |                       |
| I was able to participate and contribute to the clinical activities                                   |                      |                                                |                 |                |              |                       |
| Other comments:                                                                                       |                      |                                                |                 |                |              |                       |
| <b>Education &amp; Research Experience</b>                                                            |                      |                                                |                 |                |              |                       |
| I had a good access to the educational activities such as local teachings and meetings.               |                      |                                                |                 |                |              |                       |
| I was able to participate in educational activities.                                                  |                      |                                                |                 |                |              |                       |
| I was able to teach in the educational activities.                                                    |                      |                                                |                 |                |              |                       |
| I had a good access to the research activities such as studies conducted during the fellowship.       |                      |                                                |                 |                |              |                       |
| I was able to participate in the research activities.                                                 |                      |                                                |                 |                |              |                       |
| I had the opportunity to be an author/co-author of an article published from the host research group. |                      |                                                |                 |                |              |                       |
| Other comments:                                                                                       |                      |                                                |                 |                |              |                       |
| <b>After the Fellowship Period ,</b>                                                                  |                      | <b>Strongly disagree</b>                       | <b>Disagree</b> | <b>Neutral</b> | <b>Agree</b> | <b>Strongly agree</b> |

|                                                                                                                             |                          |                 |                |              |                       |
|-----------------------------------------------------------------------------------------------------------------------------|--------------------------|-----------------|----------------|--------------|-----------------------|
| <b>Operative &amp; Clinical Skills</b>                                                                                      |                          |                 |                |              |                       |
| My operative exposure and competency had increased as a result of the fellowship.                                           |                          |                 |                |              |                       |
| I have gained new surgical skills/techniques during the fellowship.                                                         |                          |                 |                |              |                       |
| I was able to introduce the new skills/techniques in my own hospital/clinical practice                                      |                          |                 |                |              |                       |
| Please describe factors that made adoption easy or difficult (e.g. support from chief surgeon, lack of instrument, etc...): |                          |                 |                |              |                       |
| <hr/>                                                                                                                       |                          |                 |                |              |                       |
| My clinical exposure of the specialty had increased as a result of the fellowship                                           |                          |                 |                |              |                       |
| The clinical experience led to a change in my own hospital / clinical practice                                              |                          |                 |                |              |                       |
| Other comments:                                                                                                             |                          |                 |                |              |                       |
| <b>Education &amp; Research Skills</b>                                                                                      |                          |                 |                |              |                       |
| I continue to participate in the educational activities in the host organisation.                                           |                          |                 |                |              |                       |
| I continue to have an academic relationship with the research group in the host organisation.                               |                          |                 |                |              |                       |
| My academic and research exposure to the surgical speciality had increased as a result of the fellowship.                   |                          |                 |                |              |                       |
| Other comments:                                                                                                             |                          |                 |                |              |                       |
| <b>OVERALL</b>                                                                                                              | <b>Strongly disagree</b> | <b>Disagree</b> | <b>Neutral</b> | <b>Agree</b> | <b>Strongly agree</b> |
| I would recommend the EAES fellowship to my peers.                                                                          |                          |                 |                |              |                       |
| Because:                                                                                                                    |                          |                 |                |              |                       |
| EAES Fellowship can be improved by:                                                                                         |                          |                 |                |              |                       |
